# Supplementary material
Source: PubMed Central journal article supplement (PMC10713085)

## Imprecision nutrition? Duplicate meals result in unreliable individual glycemic responses measured by continuous glucose monitors across four dietary patterns in adults without diabetes

Aaron Hengist<sup>1</sup>, Jude Ong<sup>1</sup>, Katherine McNeel<sup>1</sup>, Juen Guo<sup>1</sup>, Kevin D Hall<sup>1</sup>\*

### Supplemental Figures

**Supplemental Figure 1.** Mean  $\pm$ SD difference and individual comparisons of duplicate meals organized by participant using A) Abbott and B) Dexcom devices. Each data point is the within-participant iAUC difference between duplicate meals. Mean  $\pm$ SD and individual comparisons of duplicate meals ordered by meal pairing (across all participants) using C) Abbott and D) Dexcom CGMs. Each data point is a duplicate meal eaten in week 2 minus the same meal eaten in week 1 with data from all participants who consumed that meal (abbott has 42 total meals for comparison across the 14 days of rotating menu, 14 days x 3 meals; dexcom has 63 total meals for comparison across 21 days of rotating menu, 21 days x 3 meals).

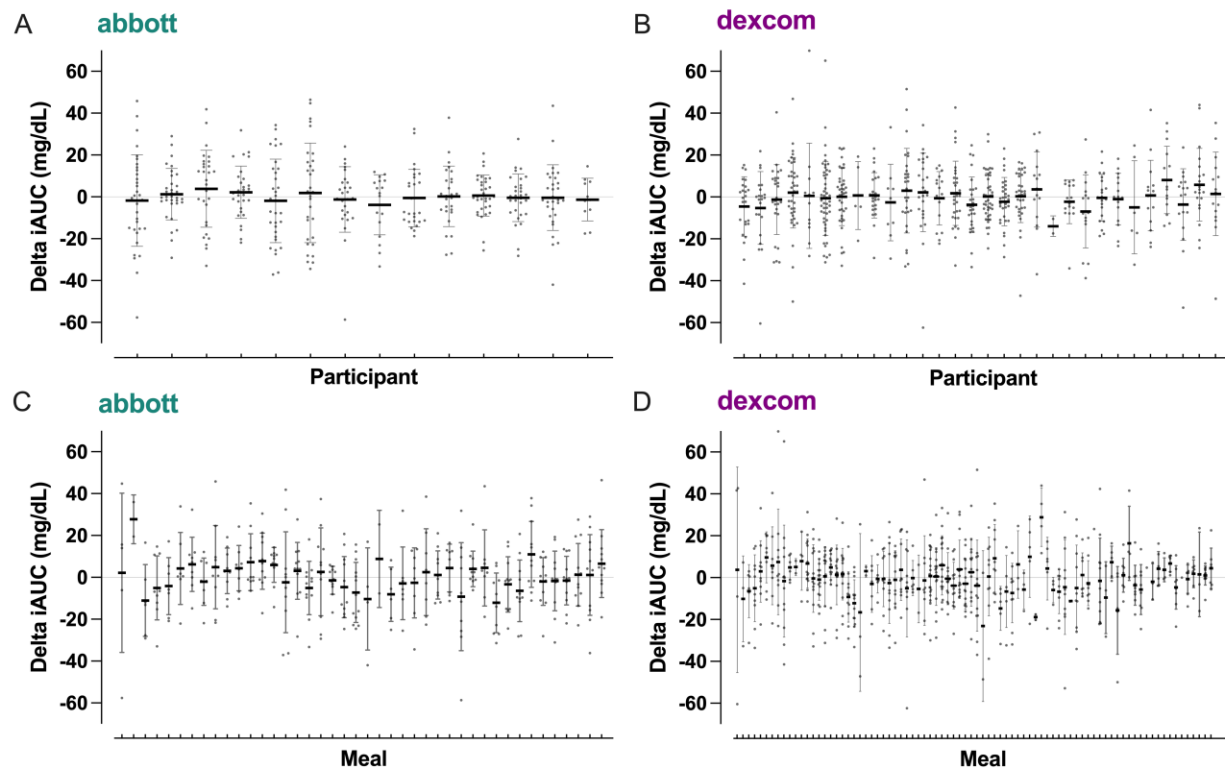

## Online Supplemental File

**Supplemental Figure 2.** Mean and individual meal responses from lower tertile and upper tertile meals during week 1 and the corresponding comparisons in week 2. Lower tertile meals were significantly higher in week 2 for Abbott (A) and Dexcom (C) and upper tertile meals were significantly lower in week 2 for Abbott (B) and Dexcom (D). Dashed lines are mean of all presented meal responses across 2 weeks. iAUC = incremental area under the curve.

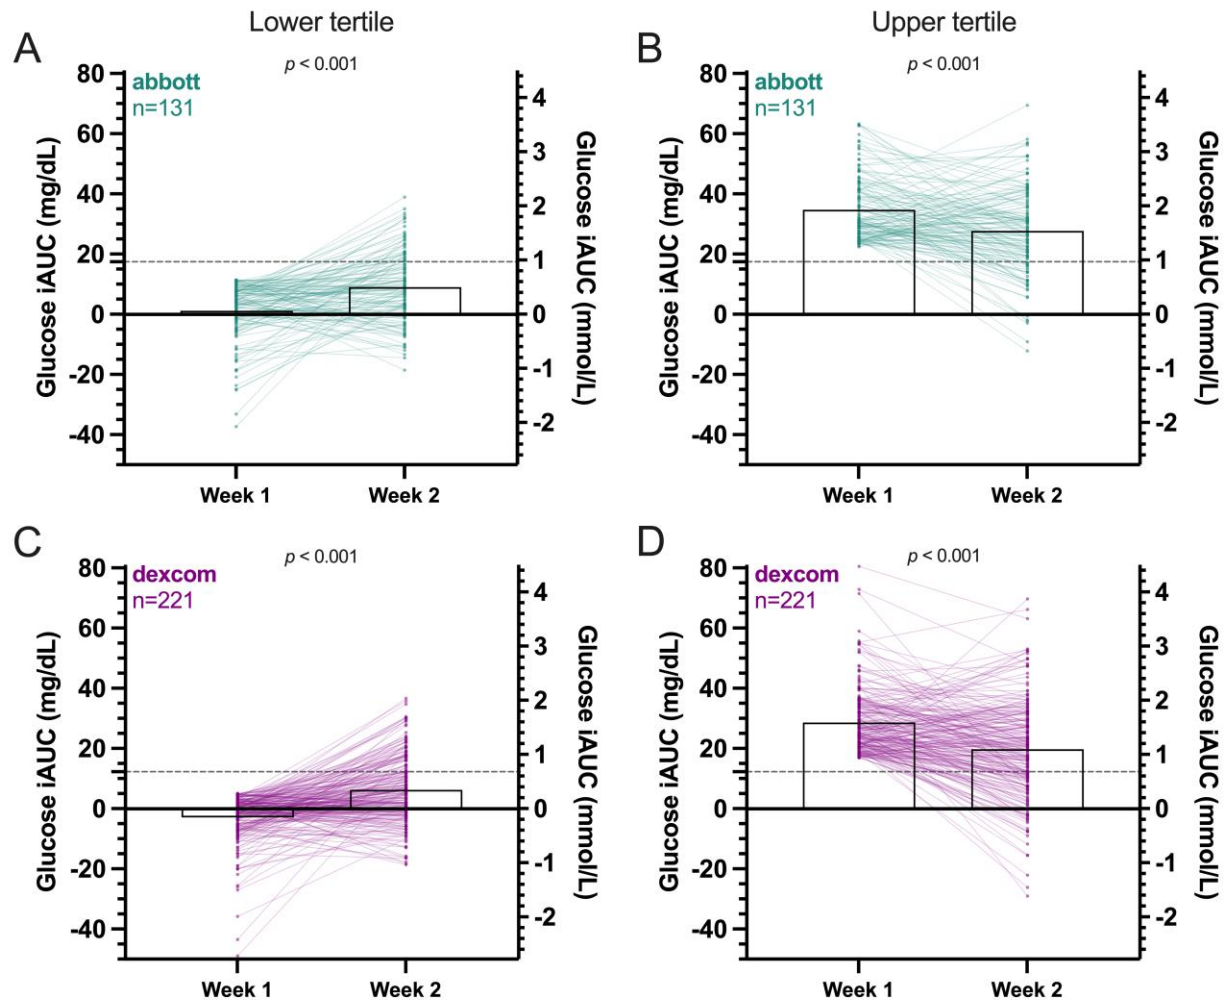

Supplement: NIHPP2023.06.14.23291406v2-supplement-1.pdf [file NIHPP2023.06.14.23291406v2-supplement-1.pdf]
